# Supplementary material for: Global variation in bacterial strains that cause tuberculosis disease: a systematic review and meta-analysis
Source: Springer Nature journal article supplement (doi:10.1186/s12916-018-1180-x), 2018-10-22

## Table of Contents

|    |                                                                                                                                   |    |
|----|-----------------------------------------------------------------------------------------------------------------------------------|----|
|    | Systematic review search strings .....                                                                                            | 2  |
|    | Supplementary tables .....                                                                                                        | 3  |
|    | Table S1. Tools to convert MTBC genotypes to a common classification scheme .....                                                 | 3  |
| 5  | Table S2. Common classification scheme for MTBC strains .....                                                                     | 4  |
|    | Table S3. Genetic diversity of MTBC strains by country .....                                                                      | 5  |
|    | Table S4. Summary of studies included in random effects (RE) meta-analysis of genetic clustering .....                            | 9  |
|    | Supplementary figures .....                                                                                                       | 11 |
| 10 | Figure S1. Human TB molecular epidemiology studies 1990-2017 .....                                                                | 11 |
|    | Figure S2. Genetic diversity and global distribution of MTBC phylogenetic lineages. ....                                          | 12 |
|    | Figure S3. Global distribution and genetic diversity and of MTBC phylogenetic lineages over time. ....                            | 13 |
|    | Figure S3A. MTBC global genotype distribution by country 1990-1999. ....                                                          | 13 |
| 15 | Figure S3B. MTBC global genotype distribution by country 2000-2004. ....                                                          | 14 |
|    | Figure S3C. MTBC global genotype distribution by country 2005-2009. ....                                                          | 14 |
|    | Figure S3D. MTBC global genotype distribution by country 2010-2017. ....                                                          | 15 |
|    | Figure S4. Random effects (RE) meta-analyses of the relative risk (RR) of transmission chains associated with MTBC lineages ..... | 16 |
| 20 | Figure S4A. RR of transmission chains for lineage 1 strains. ....                                                                 | 17 |
|    | Figure S4B. RR of transmission chains for lineage 2 Beijing strains. ....                                                         | 18 |
|    | Figure S4C. RR of transmission chains for lineage 3 strains. ....                                                                 | 19 |
|    | Figure S4D. RR of transmission chains for lineage 5 and 6 strains. ....                                                           | 20 |
|    | Figure S4E. RR of transmission chains for animal strains. ....                                                                    | 21 |
| 25 | Figure S4F. RR of transmission chains for unknown strains. ....                                                                   | 22 |

## Systematic review search strings

30 We searched PubMed and Scopus using the search strings detailed below. Articles identified from these searches were reviewed for eligibility first by screening titles and abstracts and then by reviewing full texts. Articles identified in these searches were supplemented by articles we were directed to by collaborators, as detailed in the Methods section of the main text.

| Database | Date     | Search string                                                                                                                                                                                                                                                                                                                                                                                                                                                                                                                                                                                                                                                                                                                                                                                                                                                                                                                                                                                                                                                                   |
|----------|----------|---------------------------------------------------------------------------------------------------------------------------------------------------------------------------------------------------------------------------------------------------------------------------------------------------------------------------------------------------------------------------------------------------------------------------------------------------------------------------------------------------------------------------------------------------------------------------------------------------------------------------------------------------------------------------------------------------------------------------------------------------------------------------------------------------------------------------------------------------------------------------------------------------------------------------------------------------------------------------------------------------------------------------------------------------------------------------------|
| PubMed   | 06/08/17 | ((TB[TIAB] OR tuberculosis[TIAB] OR "Mycobacterium tuberculosis"[TIAB] OR "M tuberculosis"[TIAB] OR "Mycobacterium africanum"[TIAB] OR "M africanum"[TIAB] OR "Mycobacterium tuberculosis"[MeSH] OR "Tuberculosis"[MeSH]) AND (spoligotyp*[TIAB] OR spoligo[TIAB] OR "whole genome sequencing"[TIAB] OR WGS[TIAB] OR LSP*[TIAB] OR "large sequence polymorphism"[TIAB] OR "large sequence polymorphisms"[TIAB] OR MIRU[TIAB] OR VNTR[TIAB] OR "mycobacterial interspersed repetitive units"[TIAB] OR "mycobacterial interspersed repetitive unit"[TIAB] OR "variable number of tandem repeats"[TIAB] OR "variable number tandem repeats"[TIAB] OR "variable number tandem repeat"[TIAB] OR MLVA[TIAB] OR "restriction fragment length polymorphism"[TIAB] OR RFLP[TIAB] OR genotyp*[TI]) NOT (Animals[MeSH] NOT Humans[MeSH]))                                                                                                                                                                                                                                                  |
| Scopus   | 09/01/17 | ((TITLE-ABS-KEY(TB) OR TITLE-ABS-KEY(tuberculosis) OR TITLE-ABS-KEY("Mycobacterium tuberculosis") OR TITLE-ABS-KEY("M tuberculosis") OR TITLE-ABS-KEY("Mycobacterium africanum") OR TITLE-ABS-KEY("M africanum")) AND (TITLE-ABS-KEY(spoligotyp*) OR TITLE-ABS-KEY(spoligo) OR TITLE-ABS-KEY("whole genome sequencing") OR TITLE-ABS-KEY(WGS) OR TITLE-ABS-KEY(LSP*) OR TITLE-ABS-KEY("large sequence polymorphism") OR TITLE-ABS-KEY("large sequence polymorphisms") OR TITLE-ABS-KEY(MIRU) OR TITLE-ABS-KEY(VNTR) OR TITLE-ABS-KEY("mycobacterial interspersed repetitive units") OR TITLE-ABS-KEY("mycobacterial interspersed repetitive unit") OR TITLE-ABS-KEY("variable number of tandem repeats") OR TITLE-ABS-KEY("variable number tandem repeats") OR TITLE-ABS-KEY("variable number tandem repeat") OR TITLE-ABS-KEY(mlva) OR TITLE-ABS-KEY("restriction fragment length polymorphism") OR TITLE-ABS-KEY(RFLP) OR TITLE-ABS-KEY(genotyp*))) AND NOT (TITLE-ABS-KEY(cattle) OR TITLE-ABS-KEY(livestock) OR TITLE-ABS-KEY(wildlife) OR SUBJAREA(VETE) OR DBCOLL(medl))) |
| PubMed   | 11/13/17 | ((TB[TIAB] OR tuberculosis[TIAB] OR "Mycobacterium tuberculosis"[TIAB] OR "M tuberculosis"[TIAB] OR "Mycobacterium africanum"[TIAB] OR "M africanum"[TIAB] OR "Mycobacterium tuberculosis"[MeSH] OR "Tuberculosis"[MeSH]) AND (spoligotyp*[TIAB] OR spoligo[TIAB] OR "whole genome sequencing"[TIAB] OR WGS[TIAB] OR LSP*[TIAB] OR "large sequence polymorphism"[TIAB] OR "large sequence polymorphisms"[TIAB] OR MIRU[TIAB] OR VNTR[TIAB] OR "mycobacterial interspersed repetitive units"[TIAB] OR "mycobacterial interspersed repetitive unit"[TIAB] OR "variable number of tandem repeats"[TIAB] OR "variable number tandem repeats"[TIAB] OR "variable number tandem repeat"[TIAB] OR MLVA[TIAB] OR "restriction fragment length polymorphism"[TIAB] OR RFLP[TIAB] OR genotyp*[TI]) NOT (Animals[MeSH] NOT Humans[MeSH]))                                                                                                                                                                                                                                                  |

## Supplementary tables

**Table S1. Tools to convert MTBC genotypes to a common classification scheme.**

Common genotyping methods and tools used to convert them to a common classification system based on phylogenetic lineages in this review.

40

| Convert from      | Convert to                   | Tool                                                     | Link                                                                                                          | Input                                                                                   | Output                                                                           |
|-------------------|------------------------------|----------------------------------------------------------|---------------------------------------------------------------------------------------------------------------|-----------------------------------------------------------------------------------------|----------------------------------------------------------------------------------|
| Spoligotype       | Phylogenetic lineage         | TB-Lineage                                               | <a href="http://tbinsight.cs.rpi.edu/run_tb_lineage.html">http://tbinsight.cs.rpi.edu/run_tb_lineage.html</a> | - Octal or binary spoligotypes in tab-delimited file<br>- Choice of Rules or CBN method | - Phylogenetic lineage name<br>- Probability (if using CBN)                      |
| Spoligotype clade | Phylogenetic lineage         | Supplementary file 5                                     | -                                                                                                             | Filter by spoligotype clade in sheet                                                    | Phylogenetic lineage name                                                        |
| MLVA type         | Spoligotype MLVA lineage LSP | MIRU-VNTR <i>plus</i>                                    | <a href="http://www.miru-vntrplus.org/MIRU/index.faces">http://www.miru-vntrplus.org/MIRU/index.faces</a>     | 12, 14, or 24-loci MIRU-VNTR types in Excel or CSV file                                 | - Species<br>- MLVA MtbC15-9<br>- SpolDB4 Type<br>- Spoligotype<br>- LSP and SNP |
| MLVA lineage      | Phylogenetic lineage         | Supplementary file 5                                     | -                                                                                                             | Filter by MLVA lineage in sheet                                                         | Phylogenetic lineage name                                                        |
| LSP               | Phylogenetic lineage         | Gagneaux <i>et al.</i> Lancet Infect Dis 2007; 7: 328–37 | <a href="http://dx.doi.org/10.1016/S1473-3099(07)70108-1">http://dx.doi.org/10.1016/S1473-3099(07)70108-1</a> | Identify region of difference (RD) number in Figure 1                                   | Phylogenetic lineage name                                                        |
| LSP               | Phylogenetic lineage         | Supplementary file 5                                     | -                                                                                                             | Filter by LSP number in sheet                                                           | Phylogenetic lineage name                                                        |

45 **Table S2. Common classification scheme for MTBC strains.** Common genotypes and how they were converted to a common classification system based on phylogenetic lineages in this review. Detailed conversion of all genotypes identified in this study are available in Additional file 5.

| Phylogenetic lineage number | Phylogenetic lineage name | LSP number                                       | MLVA lineages                                                                                                                                                                            | Spoligotype clades                                                                                                                                                                                                                                                                                                                                                                                                                                                                                                                                                                                                 |
|-----------------------------|---------------------------|--------------------------------------------------|------------------------------------------------------------------------------------------------------------------------------------------------------------------------------------------|--------------------------------------------------------------------------------------------------------------------------------------------------------------------------------------------------------------------------------------------------------------------------------------------------------------------------------------------------------------------------------------------------------------------------------------------------------------------------------------------------------------------------------------------------------------------------------------------------------------------|
| 1                           | Indo-Oceanic              | 239                                              | EAI, Indo-Oceanic                                                                                                                                                                        | EAI, EAI1, EAI1-SOM, EAI2, EAI2-Manila, EAI2-Nonthaburi, EAI2-NTB, EAI3, EAI3-IND, EAI4, EAI4-VNM, EAI5, EAI6-BGD1, EAI7-BGD2, EAI8-MDG, Manu_ancestor, Manu1                                                                                                                                                                                                                                                                                                                                                                                                                                                      |
| 2                           | East Asian                | 105, 142, 150, 181, 207                          | Beijing, East-Asian, ST11/26, ST25/19, ST3, STK                                                                                                                                          | Beijing, Beijing-like                                                                                                                                                                                                                                                                                                                                                                                                                                                                                                                                                                                              |
| 3                           | East African-Indian       | 750                                              | CAS, Delhi/CAS                                                                                                                                                                           | CAS, CAS1, CAS1-DAR, CAS1-Delhi, CAS1-Kili, CAS2, CAS-KILI, H2, KILI, U(CAS_ANCESTORO)                                                                                                                                                                                                                                                                                                                                                                                                                                                                                                                             |
| 4                           | Euro-American             | 115, 122, 174, 182, 183, 193, 219, 724, 726, 761 | Cameroon, Congo, Ethiopia_2, Ethiopia_H37rvlike, Euro-American, Ghana, H37Rv, H37Rv-like, Haarlem, LAM, NEW-1, NW-ETH2, NW-ETH4, S, T, T or undefined, TUR, Uganda I, Uganda II, URAL, X | Ambiguous:T2 T5, Ambiguous:T3 T2, Ambiguous:T4 T2, Cameroon, EAI1-SOM, Euro-American, F33, Family33, Family36, Gambian family, Ghana, H, H1, H1-S, H3, H3-T3, H37, H37Rv, H37Rv-like, H3-Ural-1, H4, H4-Ural-2, Haarlem, Haarlem1, Haarlem2, Haarlem3, LAM, LAM1, LAM10, LAM10-CAM, LAM11-ZWE, LAM12-Madrid1, LAM2, LAM3, LAM4, LAM5, LAM6, LAM7, LAM7-TUR, LAM8, LAM9, Manu, Manu2, Manu3, S, T, T1, T1 RUS1, T1-RUS2, T1T2, T2, T2-T3, T2-Uganda, T3, T3-ETH, T3-OSA, T4, T4-CEU1, T5, T5-Madrid2, T5-RUS1, T-H37Rv-3, TS, T-Tuscany, TUR, Turkey, U/H3, Uganda I, Uganda II, Ural, X, X1, X1-LAM9, X2, X3, ZERO |
| 5, 6                        | West African              | 702, 711                                         | Africanum, M. africanum, West African, West African 1, West African 2                                                                                                                    | AFRI, AFRI_1, AFRI_2, AFRI_3, West Africa I, West Africa II                                                                                                                                                                                                                                                                                                                                                                                                                                                                                                                                                        |
| 7                           | Ethiopian                 | -                                                | Ethiopia_1, Ethiopia_3, Lineage 7, NW-ETH1, NW-ETH3                                                                                                                                      | -                                                                                                                                                                                                                                                                                                                                                                                                                                                                                                                                                                                                                  |
| -                           | Animal                    | 7, 8, 10 (M. bovis)                              | Bovis, Caprae, Llama, M. bovis, M. bovis BCG, M. caprae, M. microti, M. orygis, M. pinnipedi, Seal, Vole                                                                                 | BOV, BOV_1, BOV_2, BOV_3, BOV_4-Caprae, BOVIS, Microti, PINI, PINI1, PINI2, PINI2                                                                                                                                                                                                                                                                                                                                                                                                                                                                                                                                  |
| -                           | Other                     | -                                                | Undefined, Unknown, Other                                                                                                                                                                | CZ-ST 1, CZ-ST 2, CZ-ST 3, CZ-ST 4, CZ-ST 5, CZ-ST 6, Mixed, NA, ND, New, Other, U, Undefined, Unknown, Vietnam type                                                                                                                                                                                                                                                                                                                                                                                                                                                                                               |

50 **Table S3. Genetic diversity of MTBC strains by country.** Total counts of isolates and proportions (shown in parentheses) of MTBC phylogenetic lineages collected in each country where data was available for inclusion in the systematic review. Raw data can be found in Additional file 3.

| Location             | Lineage 1       | Lineage 2      | Lineage 3       | Lineage 4        | Lineage 7      | Animal        | Lineage 5 & 6   | Other           | Total |
|----------------------|-----------------|----------------|-----------------|------------------|----------------|---------------|-----------------|-----------------|-------|
| <b>Africa</b>        | 1489<br>(0.064) | 812<br>(0.035) | 2232<br>(0.095) | 16350<br>(0.699) | 162<br>(0.007) | 40<br>(0.002) | 1279<br>(0.055) | 1030<br>(0.044) | 23394 |
| <b>Algeria</b>       | 0               | 0              | 0               | 114<br>(0.884)   | 0              | 0             | 0               | 15<br>(0.116)   | 129   |
| <b>Angola</b>        | 0               | 0              | 0               | 88 (1)           | 0              | 0             | 0               | 0               | 88    |
| <b>Botswana</b>      | 79<br>(0.049)   | 98<br>(0.061)  | 10<br>(0.006)   | 1428<br>(0.884)  | 0              | 1 (0.001)     | 0               | 0               | 1616  |
| <b>Burkina Faso</b>  | 4 (0.033)       | 0              | 2 (0.017)       | 99<br>(0.825)    | 0              | 1 (0.008)     | 1 (0.008)       | 13<br>(0.108)   | 120   |
| <b>Cameroon</b>      | 0               | 0              | 3 (0.002)       | 1587<br>(0.847)  | 0              | 2 (0.001)     | 59<br>(0.032)   | 223<br>(0.119)  | 1874  |
| <b>Chad</b>          | 3 (0.01)        | 0              | 18<br>(0.058)   | 288<br>(0.926)   | 0              | 0             | 2 (0.006)       | 0               | 311   |
| <b>Congo</b>         | 1 (0.014)       | 1 (0.014)      | 2 (0.027)       | 64<br>(0.865)    | 0              | 0             | 6 (0.081)       | 0               | 74    |
| <b>Djibouti</b>      | 4 (0.065)       | 0              | 14<br>(0.226)   | 30<br>(0.484)    | 0              | 1 (0.016)     | 0               | 13 (0.21)       | 62    |
| <b>Egypt</b>         | 0               | 0              | 14<br>(0.061)   | 175<br>(0.761)   | 0              | 0             | 0               | 41<br>(0.178)   | 230   |
| <b>Ethiopia</b>      | 48<br>(0.019)   | 3 (0.001)      | 591<br>(0.238)  | 1582<br>(0.638)  | 162<br>(0.065) | 8 (0.003)     | 37<br>(0.015)   | 47<br>(0.019)   | 2478  |
| <b>Gabon</b>         | 12<br>(0.038)   | 12<br>(0.038)  | 0               | 247<br>(0.777)   | 0              | 0             | 10<br>(0.031)   | 37<br>(0.116)   | 318   |
| <b>Gambia</b>        | 6 (0.017)       | 10<br>(0.028)  | 6 (0.017)       | 188<br>(0.524)   | 0              | 0             | 138<br>(0.384)  | 11<br>(0.031)   | 359   |
| <b>Ghana</b>         | 53<br>(0.014)   | 116<br>(0.031) | 37 (0.01)       | 2748<br>(0.732)  | 0              | 23<br>(0.006) | 778<br>(0.207)  | 1               | 3756  |
| <b>Guinea-Bissau</b> | 30<br>(0.074)   | 7 (0.017)      | 3 (0.007)       | 164<br>(0.403)   | 0              | 0             | 195<br>(0.479)  | 8 (0.02)        | 407   |
| <b>Kenya</b>         | 16 (0.03)       | 66<br>(0.123)  | 129<br>(0.241)  | 278<br>(0.519)   | 0              | 0             | 0               | 47<br>(0.088)   | 536   |
| <b>Madagascar</b>    | 60<br>(0.134)   | 45 (0.1)       | 45 (0.1)        | 286<br>(0.637)   | 0              | 3 (0.007)     | 0               | 10<br>(0.022)   | 449   |
| <b>Malawi</b>        | 807<br>(0.159)  | 222<br>(0.044) | 615<br>(0.122)  | 3417<br>(0.675)  | 0              | 0             | 0               | 0               | 5061  |
| <b>Mali</b>          | 6 (0.048)       | 1 (0.008)      | 2 (0.016)       | 84<br>(0.667)    | 0              | 1 (0.008)     | 32<br>(0.254)   | 0               | 126   |
| <b>Morocco</b>       | 0               | 5 (0.007)      | 0               | 694<br>(0.918)   | 0              | 0             | 0               | 57<br>(0.076)   | 755   |
| <b>Mozambique</b>    | 132<br>(0.297)  | 31 (0.07)      | 11<br>(0.025)   | 255<br>(0.573)   | 0              | 0             | 0               | 16<br>(0.036)   | 445   |
| <b>Nigeria</b>       | 7 (0.039)       | 0              | 0               | 152<br>(0.844)   | 0              | 0             | 21<br>(0.117)   | 0               | 180   |
| <b>South Africa</b>  | 5 (0.007)       | 115<br>(0.166) | 15<br>(0.022)   | 501<br>(0.722)   | 0              | 0             | 0               | 58<br>(0.084)   | 694   |
| <b>Sudan</b>         | 0               | 7 (0.03)       | 130<br>(0.56)   | 32<br>(0.138)    | 0              | 0             | 0               | 63<br>(0.272)   | 232   |

|                            |                  |                  |                 |                  |   |                |                |                 |        |
|----------------------------|------------------|------------------|-----------------|------------------|---|----------------|----------------|-----------------|--------|
| <b>Tanzania</b>            | 201<br>(0.143)   | 64<br>(0.046)    | 501<br>(0.357)  | 565<br>(0.403)   | 0 | 0              | 0              | 72<br>(0.051)   | 1403   |
| <b>Tunisia</b>             | 1 (0.003)        | 0                | 0               | 374<br>(0.989)   | 0 | 0              | 0              | 3 (0.008)       | 378    |
| <b>Uganda</b>              | 12<br>(0.013)    | 9 (0.01)         | 82<br>(0.089)   | 656<br>(0.711)   | 0 | 0              | 0              | 164<br>(0.178)  | 923    |
| <b>Zambia</b>              | 2 (0.007)        | 0                | 2 (0.007)       | 174<br>(0.637)   | 0 | 0              | 0              | 95<br>(0.348)   | 273    |
| <b>Zimbabwe</b>            | 0                | 0                | 0               | 80 (0.69)        | 0 | 0              | 0              | 36 (0.31)       | 116    |
| <b>Americas</b>            | 16502<br>(0.151) | 17731<br>(0.163) | 3676<br>(0.034) | 68790<br>(0.631) | 0 | 827<br>(0.008) | 352<br>(0.003) | 1215<br>(0.011) | 109093 |
| <b>Brazil</b>              | 110<br>(0.041)   | 7 (0.003)        | 8 (0.003)       | 2423<br>(0.896)  | 0 | 0              | 1              | 154<br>(0.057)  | 2703   |
| <b>Canada</b>              | 1109<br>(0.211)  | 982<br>(0.187)   | 658<br>(0.125)  | 2149<br>(0.409)  | 0 | 25<br>(0.005)  | 5 (0.001)      | 327<br>(0.062)  | 5255   |
| <b>Chile</b>               | 0                | 4 (0.008)        | 3 (0.006)       | 487<br>(0.984)   | 0 | 0              | 1 (0.002)      | 0               | 495    |
| <b>Colombia</b>            | 9 (0.012)        | 24<br>(0.032)    | 1 (0.001)       | 570<br>(0.769)   | 0 | 1 (0.001)      | 0              | 136<br>(0.184)  | 741    |
| <b>Cuba</b>                | 0                | 106<br>(0.194)   | 0               | 367<br>(0.671)   | 0 | 0              | 0              | 74<br>(0.135)   | 547    |
| <b>Greenland</b>           | 0                | 0                | 0               | 182 (1)          | 0 | 0              | 0              | 0               | 182    |
| <b>Honduras</b>            | 0                | 1 (0.005)        | 0               | 194<br>(0.942)   | 0 | 0              | 0              | 11<br>(0.053)   | 206    |
| <b>Mexico</b>              | 185<br>(0.094)   | 26<br>(0.013)    | 19 (0.01)       | 1490<br>(0.756)  | 0 | 5 (0.003)      | 14<br>(0.007)  | 233<br>(0.118)  | 1972   |
| <b>Panama</b>              | 60<br>(0.143)    | 20<br>(0.048)    | 2 (0.005)       | 321<br>(0.764)   | 0 | 0              | 17 (0.04)      | 0               | 420    |
| <b>Paraguay</b>            | 0                | 1 (0.006)        | 2 (0.012)       | 170<br>(0.983)   | 0 | 0              | 0              | 0               | 173    |
| <b>Peru</b>                | 0                | 355<br>(0.121)   | 0               | 2344<br>(0.796)  | 0 | 0              | 0              | 245<br>(0.083)  | 2944   |
| <b>Trinidad and Tobago</b> | 4 (0.03)         | 6 (0.045)        | 1 (0.008)       | 107<br>(0.811)   | 0 | 0              | 0              | 14<br>(0.106)   | 132    |
| <b>United States</b>       | 15025<br>(0.162) | 16199<br>(0.175) | 2982<br>(0.032) | 57374<br>(0.619) | 0 | 796<br>(0.009) | 312<br>(0.003) | 0               | 92688  |
| <b>Venezuela</b>           | 0                | 0                | 0               | 612<br>(0.964)   | 0 | 0              | 2 (0.003)      | 21<br>(0.033)   | 635    |
| <b>East Asia</b>           | 2065<br>(0.094)  | 12733<br>(0.582) | 534<br>(0.024)  | 3770<br>(0.172)  | 0 | 7              | 2              | 2768<br>(0.127) | 21879  |
| <b>China</b>               | 38<br>(0.003)    | 9141<br>(0.722)  | 93<br>(0.007)   | 2103<br>(0.166)  | 0 | 0              | 0              | 1277<br>(0.101) | 12652  |
| <b>Indonesia</b>           | 204<br>(0.116)   | 504<br>(0.287)   | 3 (0.002)       | 552<br>(0.314)   | 0 | 1 (0.001)      | 1 (0.001)      | 492<br>(0.28)   | 1757   |
| <b>Japan</b>               | 13<br>(0.078)    | 110<br>(0.663)   | 2 (0.012)       | 41<br>(0.247)    | 0 | 0              | 0              | 0               | 166    |
| <b>Korea, Republic of</b>  | 10<br>(0.033)    | 278<br>(0.914)   | 0               | 15<br>(0.049)    | 0 | 1 (0.003)      | 0              | 0               | 304    |
| <b>Malaysia</b>            | 125<br>(0.568)   | 63<br>(0.286)    | 3 (0.014)       | 24<br>(0.109)    | 0 | 1 (0.005)      | 0              | 4 (0.018)       | 220    |
| <b>Mongolia</b>            | 0                | 65 (0.58)        | 0               | 47 (0.42)        | 0 | 0              | 0              | 0               | 112    |
| <b>Myanmar</b>             | 149<br>(0.481)   | 100<br>(0.323)   | 15<br>(0.048)   | 32<br>(0.103)    | 0 | 0              | 1 (0.003)      | 13<br>(0.042)   | 310    |
| <b>Philippines</b>         | 110<br>(0.973)   | 1 (0.009)        | 0               | 2 (0.018)        | 0 | 0              | 0              | 0               | 113    |

|                         |                 |                 |                  |                  |   |                |               |                 |       |
|-------------------------|-----------------|-----------------|------------------|------------------|---|----------------|---------------|-----------------|-------|
| <b>Singapore</b>        | 9 (0.17)        | 21<br>(0.396)   | 0                | 11<br>(0.208)    | 0 | 0              | 0             | 12<br>(0.226)   | 53    |
| <b>Taiwan</b>           | 418<br>(0.188)  | 966<br>(0.434)  | 0                | 642<br>(0.288)   | 0 | 4 (0.002)      | 0             | 194<br>(0.087)  | 2224  |
| <b>Viet Nam</b>         | 989<br>(0.249)  | 1484<br>(0.374) | 418<br>(0.105)   | 301<br>(0.076)   | 0 | 0              | 0             | 776<br>(0.196)  | 3968  |
| <b>Europe</b>           | 3412<br>(0.108) | 2048<br>(0.065) | 4803<br>(0.152)  | 17135<br>(0.544) | 0 | 343<br>(0.011) | 303<br>(0.01) | 3455<br>(0.11)  | 31499 |
| <b>Belgium</b>          | 19<br>(0.021)   | 37<br>(0.041)   | 51<br>(0.056)    | 773<br>(0.849)   | 0 | 14<br>(0.015)  | 16<br>(0.018) | 0               | 910   |
| <b>Bulgaria</b>         | 1 (0.009)       | 0               | 0                | 101<br>(0.886)   | 0 | 0              | 0             | 12<br>(0.105)   | 114   |
| <b>Croatia</b>          | 1 (0.001)       | 2 (0.001)       | 0                | 1059<br>(0.667)  | 0 | 0              | 1 (0.001)     | 524<br>(0.33)   | 1587  |
| <b>Czech Republic</b>   | 0               | 7 (0.033)       | 0                | 109<br>(0.522)   | 0 | 0              | 0             | 93<br>(0.445)   | 209   |
| <b>Estonia</b>          | 0               | 357<br>(0.391)  | 0                | 421<br>(0.462)   | 0 | 0              | 0             | 134<br>(0.147)  | 912   |
| <b>Finland</b>          | 119<br>(0.083)  | 80<br>(0.056)   | 47<br>(0.033)    | 938<br>(0.657)   | 0 | 1 (0.001)      | 3 (0.002)     | 240<br>(0.168)  | 1428  |
| <b>France</b>           | 94<br>(0.033)   | 90<br>(0.032)   | 31<br>(0.011)    | 2235<br>(0.786)  | 0 | 96<br>(0.034)  | 39<br>(0.014) | 257<br>(0.09)   | 2842  |
| <b>Ireland</b>          | 54<br>(0.075)   | 65 (0.09)       | 51<br>(0.071)    | 423<br>(0.588)   | 0 | 6 (0.008)      | 0             | 120<br>(0.167)  | 719   |
| <b>Italy</b>            | 33<br>(0.025)   | 47<br>(0.036)   | 35<br>(0.027)    | 997<br>(0.756)   | 0 | 31<br>(0.024)  | 15<br>(0.011) | 161<br>(0.122)  | 1319  |
| <b>Netherlands</b>      | 384<br>(0.102)  | 274<br>(0.073)  | 328<br>(0.087)   | 2621<br>(0.694)  | 0 | 62<br>(0.016)  | 59<br>(0.016) | 48<br>(0.013)   | 3776  |
| <b>Portugal</b>         | 20<br>(0.023)   | 101<br>(0.114)  | 2 (0.002)        | 660<br>(0.747)   | 0 | 0              | 10<br>(0.011) | 91<br>(0.103)   | 884   |
| <b>Spain</b>            | 4 (0.013)       | 0               | 2 (0.006)        | 310<br>(0.975)   | 0 | 1 (0.003)      | 1 (0.003)     | 0               | 318   |
| <b>Sweden</b>           | 53<br>(0.093)   | 38<br>(0.067)   | 49<br>(0.086)    | 267<br>(0.469)   | 0 | 2 (0.004)      | 0             | 160<br>(0.281)  | 569   |
| <b>Ukraine</b>          | 0               | 32<br>(0.327)   | 0                | 30<br>(0.306)    | 0 | 0              | 0             | 36<br>(0.367)   | 98    |
| <b>United Kingdom</b>   | 2630<br>(0.166) | 918<br>(0.058)  | 4207<br>(0.266)  | 6191<br>(0.391)  | 0 | 130<br>(0.008) | 159<br>(0.01) | 1579<br>(0.1)   | 15814 |
| <b>Oceania</b>          | 686<br>(0.198)  | 913<br>(0.264)  | 401<br>(0.116)   | 707<br>(0.204)   | 0 | 3 (0.001)      | 1             | 752<br>(0.217)  | 3463  |
| <b>Australia</b>        | 569<br>(0.22)   | 676<br>(0.262)  | 315<br>(0.122)   | 290<br>(0.112)   | 0 | 0              | 0             | 735<br>(0.284)  | 2585  |
| <b>Kiribati</b>         | 1 (0.014)       | 36<br>(0.507)   | 0                | 25<br>(0.352)    | 0 | 0              | 0             | 9 (0.127)       | 71    |
| <b>New Zealand</b>      | 110<br>(0.226)  | 95<br>(0.195)   | 86<br>(0.177)    | 184<br>(0.378)   | 0 | 3 (0.006)      | 1 (0.002)     | 8 (0.016)       | 487   |
| <b>Papua New Guinea</b> | 6 (0.019)       | 106<br>(0.331)  | 0                | 208<br>(0.65)    | 0 | 0              | 0             | 0               | 320   |
| <b>West Asia</b>        | 4646<br>(0.106) | 4659<br>(0.107) | 13470<br>(0.308) | 15934<br>(0.365) | 0 | 226<br>(0.005) | 1             | 4737<br>(0.108) | 43673 |
| <b>Bangladesh</b>       | 105<br>(0.432)  | 39 (0.16)       | 35<br>(0.144)    | 33<br>(0.136)    | 0 | 0              | 0             | 31<br>(0.128)   | 243   |
| <b>Georgia</b>          | 0               | 220<br>(0.323)  | 2 (0.003)        | 418<br>(0.613)   | 0 | 1 (0.001)      | 0             | 41 (0.06)       | 682   |

|                                  |                 |                 |                  |                  |   |                |   |                 |       |
|----------------------------------|-----------------|-----------------|------------------|------------------|---|----------------|---|-----------------|-------|
| <b>India</b>                     | 3498<br>(0.483) | 370<br>(0.051)  | 1358<br>(0.188)  | 548<br>(0.076)   | 0 | 0              | 0 | 1466<br>(0.202) | 7240  |
| <b>Iran, Islamic Republic of</b> | 527<br>(0.019)  | 2230<br>(0.079) | 10286<br>(0.366) | 12491<br>(0.445) | 0 | 210<br>(0.007) | 1 | 2347<br>(0.084) | 28092 |
| <b>Iraq</b>                      | 1 (0.005)       | 0               | 69<br>(0.377)    | 113<br>(0.617)   | 0 | 0              | 0 | 0               | 183   |
| <b>Israel</b>                    | 39<br>(0.057)   | 101<br>(0.148)  | 140<br>(0.205)   | 294<br>(0.43)    | 0 | 0              | 0 | 109<br>(0.16)   | 683   |
| <b>Nepal</b>                     | 0               | 0               | 64<br>(0.364)    | 69<br>(0.392)    | 0 | 0              | 0 | 43<br>(0.244)   | 176   |
| <b>Oman</b>                      | 50<br>(0.234)   | 13<br>(0.061)   | 85<br>(0.397)    | 38<br>(0.178)    | 0 | 0              | 0 | 28<br>(0.131)   | 214   |
| <b>Pakistan</b>                  | 178<br>(0.103)  | 52 (0.03)       | 1085<br>(0.63)   | 139<br>(0.081)   | 0 | 0              | 0 | 269<br>(0.156)  | 1723  |
| <b>Russian Federation</b>        | 3 (0.001)       | 1553<br>(0.574) | 7 (0.003)        | 1083<br>(0.401)  | 0 | 2 (0.001)      | 0 | 56<br>(0.021)   | 2704  |
| <b>Saudi Arabia</b>              | 215<br>(0.143)  | 67<br>(0.045)   | 339<br>(0.225)   | 587<br>(0.39)    | 0 | 13<br>(0.009)  | 0 | 284<br>(0.189)  | 1505  |
| <b>Sri Lanka</b>                 | 30 (0.3)        | 14 (0.14)       | 0                | 13 (0.13)        | 0 | 0              | 0 | 43 (0.43)       | 100   |
| <b>Turkey</b>                    | 0               | 0               | 0                | 108<br>(0.844)   | 0 | 0              | 0 | 20<br>(0.156)   | 128   |

55



**Table S4. Summary of studies included in random effects (RE) meta-analysis of genetic clustering.** These studies are included in the RE meta-analyses in Figure S4 and Table 1. Raw data corresponding to these studies can be found in Additional file 4. Dashes indicate that the study design or confounder variable was not reported.

| PubMed ID        | Location                     | Year (mid-point) | Collection period (months) | Sampling method  | Genotyping method | Sample size | HIV (proportion) | Age (mean) | Previous TB (proportion) | Male (proportion) | Immigrants (proportion) |
|------------------|------------------------------|------------------|----------------------------|------------------|-------------------|-------------|------------------|------------|--------------------------|-------------------|-------------------------|
| <b>Africa</b>    |                              |                  |                            |                  |                   |             |                  |            |                          |                   |                         |
| 16970826         | Dar es Salaam, Tanzania      | 2005             | 2                          | All cases        | Spoligotyping     | 145         | -                | -          | -                        | -                 | -                       |
| 19193842         | The Gambia                   | 2007             | -                          | All new patients | Spoligotyping     | 359         | 0.08             | 29.00      | 0.00                     | 0.69              | -                       |
| 22414165         | Jimma Zone, Ethiopia         | 2009             | 2                          | All new patients | Spoligotyping     | 17          | 0.06             | 41.00      | 0.50                     | 0.39              | -                       |
| 23496968         | Northwest Ethiopia           | 2009             | 3                          | All cases        | Spoligotyping     | 244         | 0.25             | 31.60      | 0.17                     | 0.58              | 0.10                    |
| 24734230         | Afar Region, Ethiopia        | 2010             | 6                          | All new patients | Spoligotyping     | 105         | 0.39             | 29.00      | 0.27                     | 0.66              | -                       |
| 26285026         | Morocco                      | 2011             | 24                         | Cluster          | Spoligotyping     | 168         | -                | 49.50      | 0.01                     | 0.74              | -                       |
| 26491657         | Bahir Dar, Ethiopia          | 2013             | 16                         | All cases        | Spoligotyping     | 170         | -                | -          | 0.15                     | 0.48              | -                       |
| 28230095         | Luanda District, Angola      | 2014             | 12                         | All cases        | Spoligotyping     | 88          | 0.15             | -          | 0.11                     | -                 | -                       |
| 26927993         | Anambra State, Nigeria       | 2010             | 24                         | All cases        | MLVA              | 180         | 0.19             | 35.00      | 0.16                     | 0.61              | -                       |
| 27149626         | Tanzania                     | 2011             | 24                         | All cases        | Spoligotyping     | 53          | 0.10             | 25.10      | -                        | 0.53              | -                       |
| 27506391         | Ghana                        | 2013             | 18                         | All new patients | Spoligotyping     | 1205        | 0.13             | 39.00      | -                        | 0.69              | -                       |
| <b>West Asia</b> |                              |                  |                            |                  |                   |             |                  |            |                          |                   |                         |
| 19108722         | Pakistan                     | 2004             | 36                         | Cluster          | Spoligotyping     | 675         | -                | -          | -                        | 0.55              | -                       |
| 21394425         | Murmansk, Russia             | 2004             | 24                         | All cases        | Spoligotyping     | 387         | -                | -          | 0.64                     | -                 | -                       |
| 22844457         | Psov, Russia                 | 2009             | 6                          | Simple random    | Spoligotyping     | 90          | 0.00             | -          | 0.28                     | 0.66              | -                       |
| 26679959         | Republic of Karelia, Russia  | 2014             | 18                         | All new patients | MLVA              | 78          | -                | 43.40      | 0.88                     | 0.72              | 0.00                    |
| 26786944         | Duhok, Iraq                  | 2009             | 12                         | All cases        | MLVA              | 49          | -                | -          | -                        | -                 | -                       |
| <b>East Asia</b> |                              |                  |                            |                  |                   |             |                  |            |                          |                   |                         |
| 19036933         | Yangon Division, Myanmar     | 2002             | 9                          | All cases        | Spoligotyping     | 310         | -                | 36.60      | 0.44                     | 0.70              | -                       |
| 22912700         | Tien Giang Province, Vietnam | 2005             | 48                         | All new patients | MLVA              | 2207        | -                | -          | 0.10                     | 0.75              | -                       |
| 25629610         | Kaohsiung, Taiwan            | 2004             | 96                         | Simple random    | Both              | 421         | -                | -          | -                        | -                 | -                       |
| 28333978         | China                        | 2007             | 12                         | Cluster          | Spoligotyping     | 3133        | -                | -          | 0.25                     | -                 | -                       |

| <b>Europe</b>   |                                    |      |     |                  |               |       |      |       |      |      |      |
|-----------------|------------------------------------|------|-----|------------------|---------------|-------|------|-------|------|------|------|
| 21439097        | Kharviv, Ukraine                   | 2004 | 3   | All cases        | MLVA          | 98    | -    | -     | 0.63 | -    | -    |
| 23658260        | The Netherlands                    | 2006 | 60  | All cases        | MLVA          | 3776  | -    | -     | 0.06 | 0.58 | -    |
| 28222189        | Brussels, Belgium                  | 2012 | 36  | All cases        | MLVA          | 910   | 0.08 | 38.40 | 0.07 | 0.64 | 0.76 |
| <b>Americas</b> |                                    |      |     |                  |               |       |      |       |      |      |      |
| 22377473        | United States                      | 2007 | 48  | All cases        | MLVA          | 36458 | 0.91 | -     | 0.05 | 0.66 | -    |
| 22982156        | San Diego, USA                     | 2007 | 36  | All cases        | Both          | 832   | 0.12 | -     | 0.06 | 0.65 | 0.78 |
| 24098337        | Espirito Santo, Brazil             | 2003 | 108 | All new patients | Spoligotyping | 506   | 0.13 | 35.90 | -    | 0.70 | -    |
| 25671320        | Santiago, Chile                    | 2011 | 60  | All cases        | MLVA          | 87    | -    | -     | -    | 0.61 | 0.12 |
| 25809979        | San Juan de Lurigancho, Lima, Peru | 2011 | 22  | All new patients | Both          | 791   | -    | -     | 0.00 | 0.61 | -    |
| 27518286        | Chile                              | 2012 | 12  | All cases        | MLVA          | 408   | -    | -     | 0.00 | 0.66 | -    |
| 28317799        | Veracruz, Mexico                   | 2015 | 12  | All cases        | Spoligotyping | 79    | 0.00 | 42.00 | 0.00 | 0.65 | -    |

## Supplementary figures

65 **Figure S1. Human TB molecular epidemiology studies 1990-2017.** Number of studies that  
 met the inclusion criteria for this review by location/year in each country. The systematic review  
 included human TB molecular epidemiology studies that performed genotyping methods that  
 could be converted to a common classification system based on phylogenetic lineages (Table  
 S1, Table S2). Studies that used unclear or convenience sampling methods, monitored bacterial  
 70 or human sub-populations, and/or only reported results for one phylogenetic lineage were  
 excluded.

**TB molecular epidemiology studies 1990–2017**

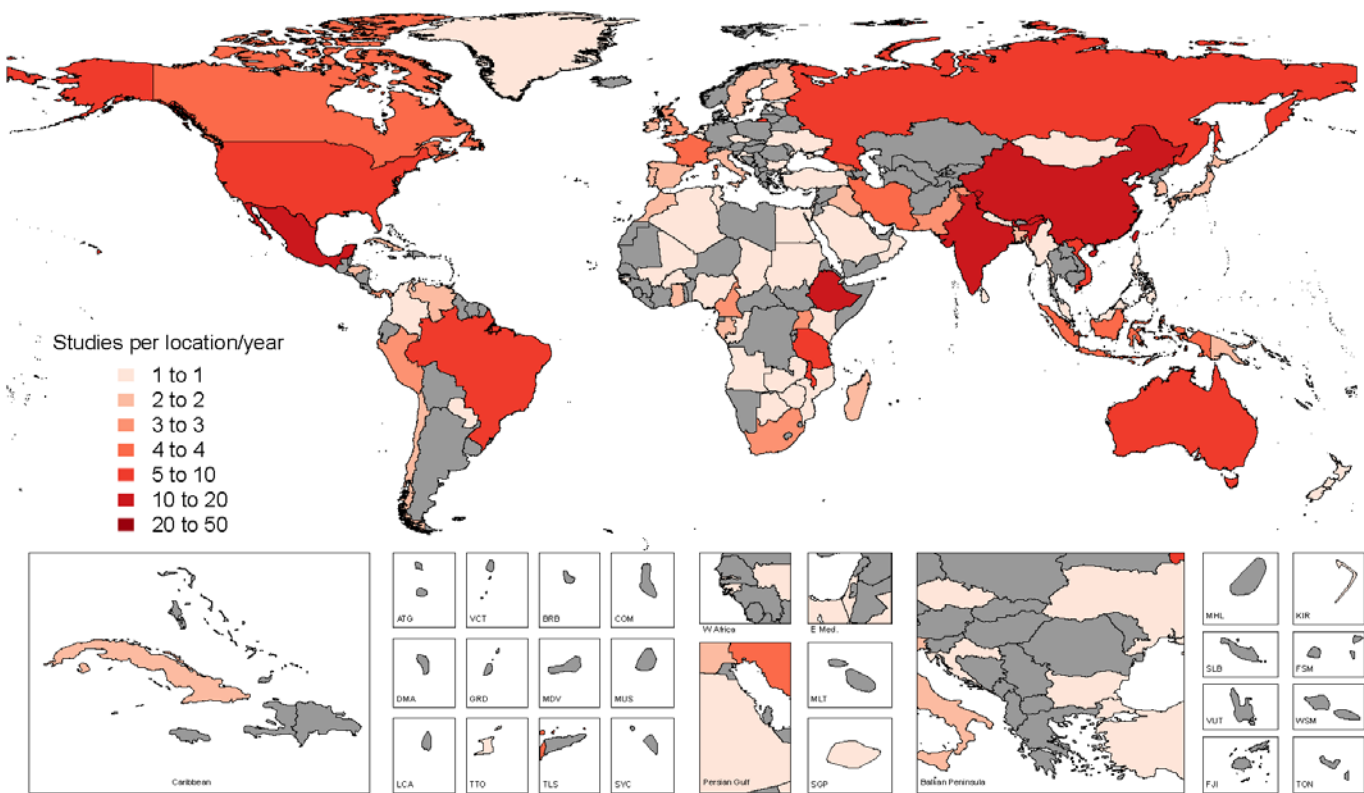

75 **Figure S2. Genetic diversity and global distribution of MTBC phylogenetic lineages.** Stacked bar charts of MTBC global genotype distribution based on a systematic review of TB molecular epidemiology studies, corresponding to the results in Figure 2, Figure 3, and Table S3. Results are shown by country and the following regions: Africa, Oceania, West Asia, North and South America, East Asia, and Europe. Countries are indicated by ISO Alpha-3 codes.

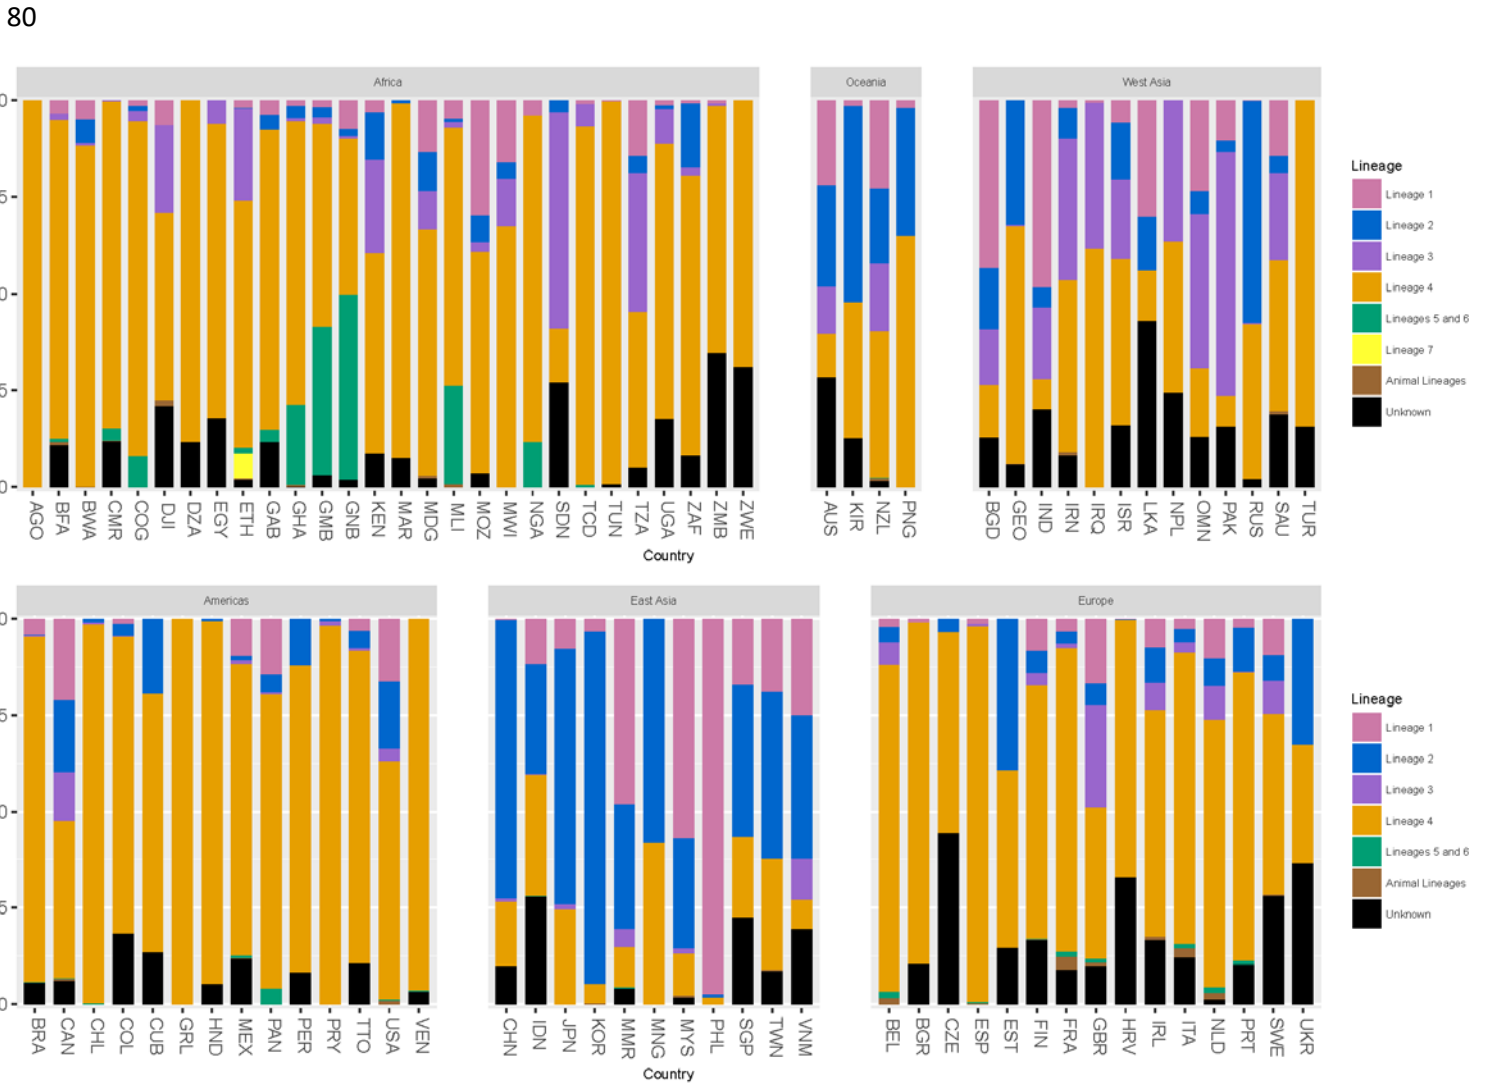

85 **Figure S3. Global distribution and genetic diversity and of MTBC phylogenetic lineages**  
**over time.** MTBC global genotype distribution by country from (A) 1990 to 1999, (B) 2000 to  
 2004, (C) 2005 to 2009, and (D) 2010 to 2017. Indo-Oceanic lineage 1 is shown in pink, lineage  
 2 is shown in blue, East African-Indian lineage 3 is shown in purple, Euro-American lineage 4 is  
 90 shown in orange, West African lineages 5 and 6 are shown in green, and Ethiopian lineage 7 is  
 shown in yellow. "Unknown" represents strain types that were not identified by authors either  
 due to low frequency or unknown genetic patterns. If multiple studies were available in a  
 country, strain counts were summed across all studies within the given time period to get final  
 proportions and sample sizes. The radius of each pie is proportional to the number of isolates  
 collected in each country. The range of sample sizes that correspond to the radii of the pies are  
 95 shown in the legend in grey pies. The example pies shown represent the minimum, mid-point,  
 and maximum sample sizes.

**Figure S3A. MTBC global genotype distribution by country 1990-1999.**

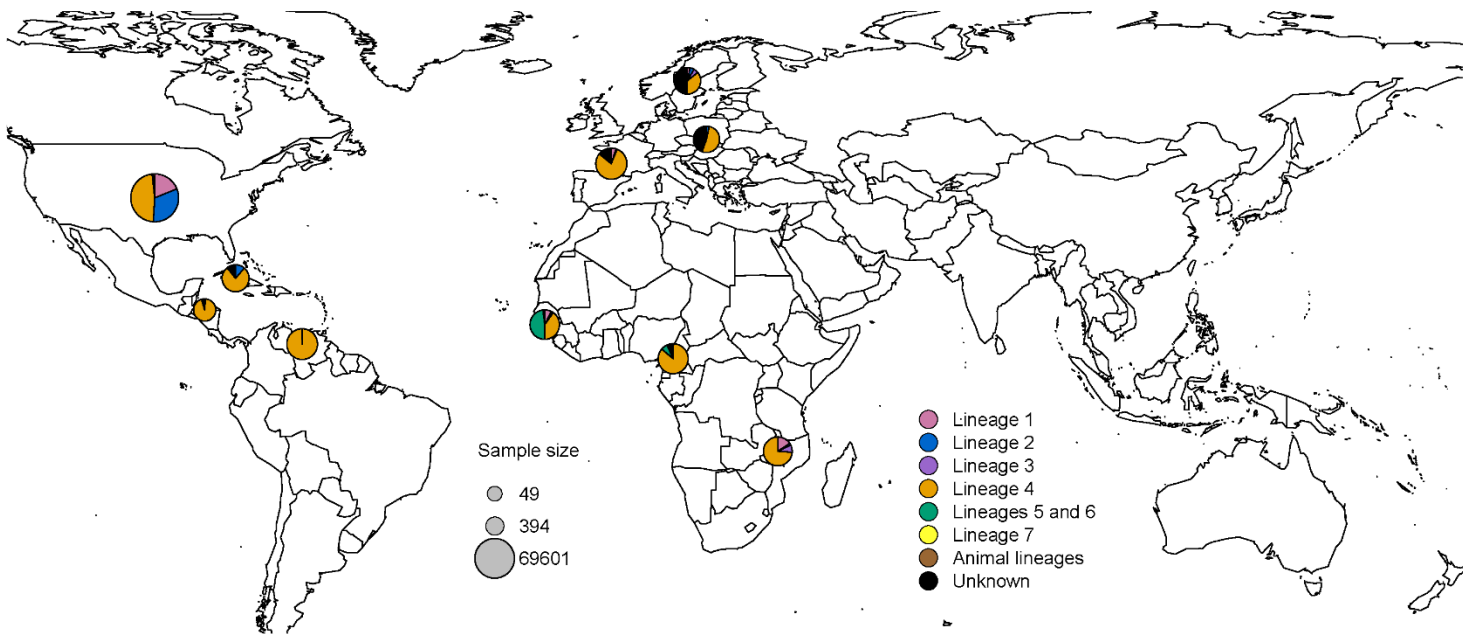

100 **Figure S3B. MTBC global genotype distribution by country 2000-2004.**

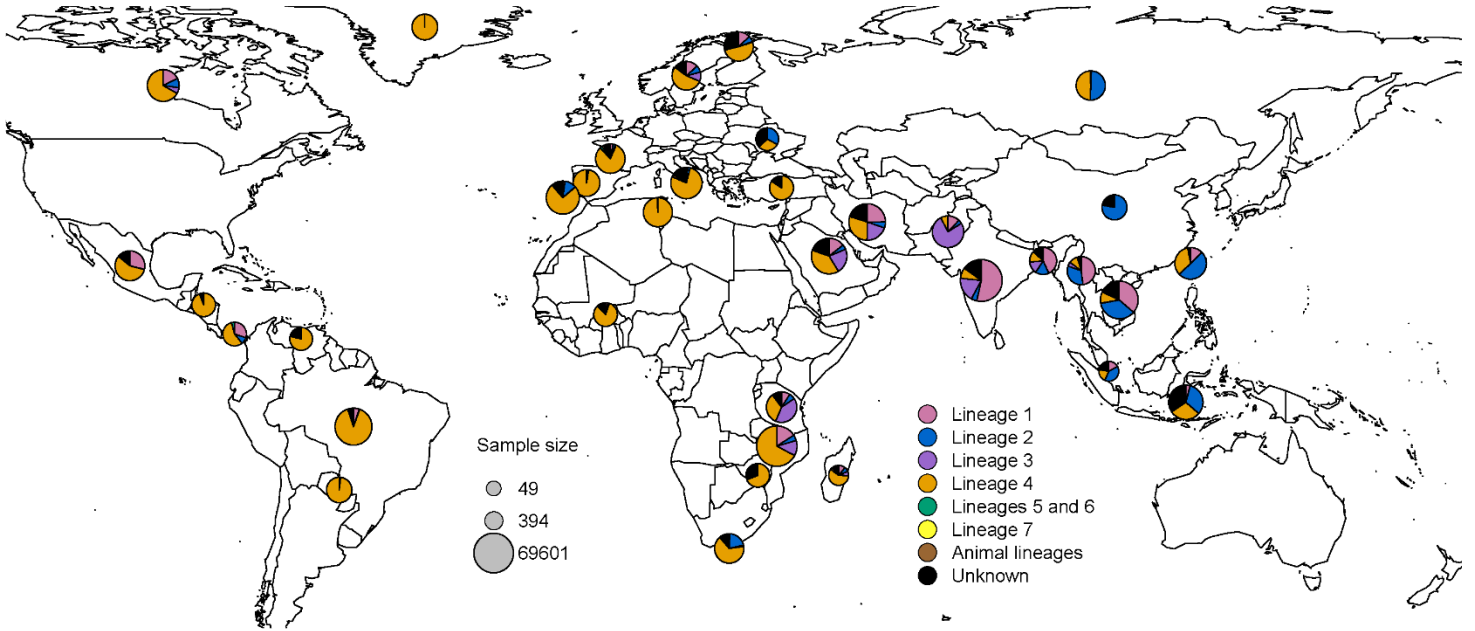

**Figure S3C. MTBC global genotype distribution by country 2005-2009.**

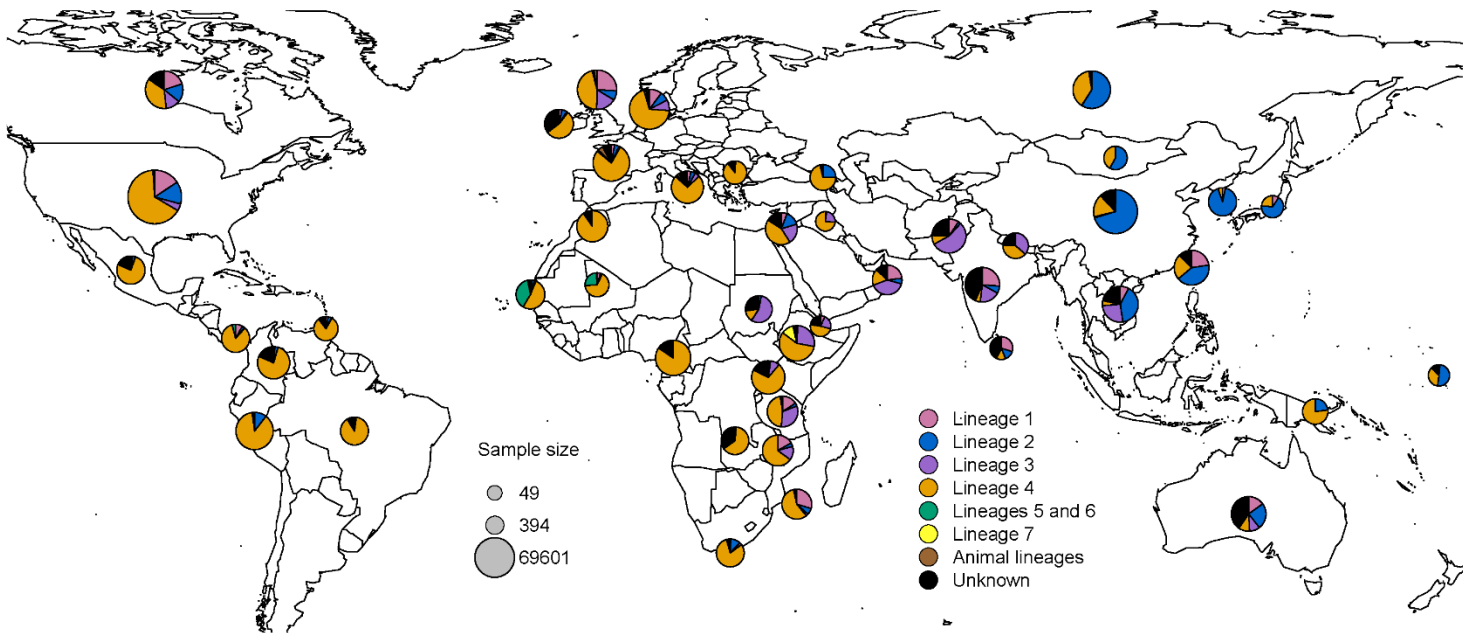

Figure S3D. MTBC global genotype distribution by country 2010-2017.

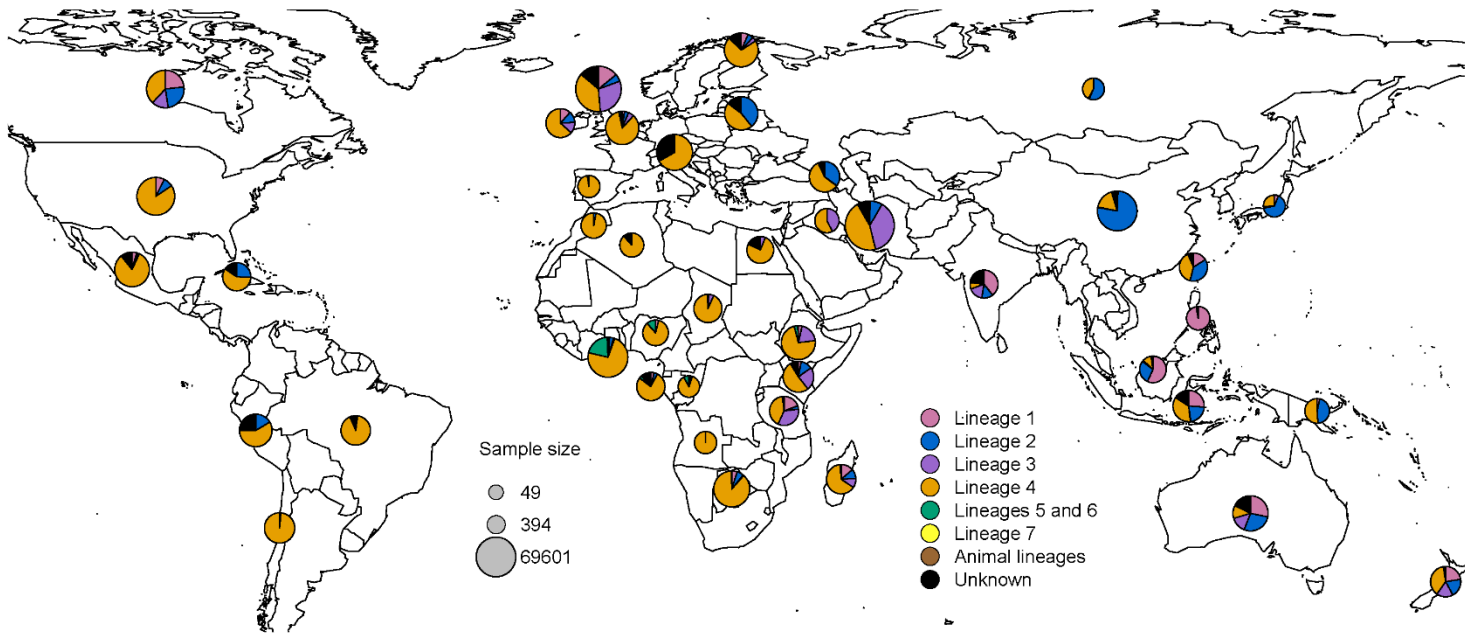

**Figure S4. Random effects (RE) meta-analyses of the relative risk (RR) of transmission chains associated with MTBC lineages.** RE meta-analysis of the RR of transmission chains associated with lineage 1 (A), lineage 2 Beijing (B), lineage 3 (C), lineage 5 and 6 (D), animal (E), and unknown (F) strains compared with lineage 4 strains as the reference group (A-F). Transmission chains in this analysis are defined as identification of two or more MTBC isolates with identical genetic patterns in the same study location and time period. “Cluster” indicates part of a transmission chain, and “unique” indicates not part of a transmission chain. We performed the analysis across all studies that reported transmission clusters by MTBC genotype that we identified in the systematic review, as well as within the regions West Asia, East Asia, Europe and Americas, and Africa. We excluded studies that identified less than two isolates of lineage 2 Beijing (A), lineage 1 (B), lineage 3 (C), lineage 5 and 6 (D), animal (E), or unknown (F) strains and studies that identified less than two isolates of lineage 4 strains (A-D). In addition, we added ½ a value to studies that identified zero isolates in the “cluster” category. RE meta-analysis was performed using the RELM method in R package ‘metafor’. Q values with corresponding degrees of freedom (df), p, and I<sup>2</sup> values are shown across all studies and within each region. RRs with corresponding confidence intervals (CI) are also shown across all studies and within each region. These analyses correspond to the results shown in Table 1.



130 **Figure S4A. RR of transmission chains for lineage 1 strains.**

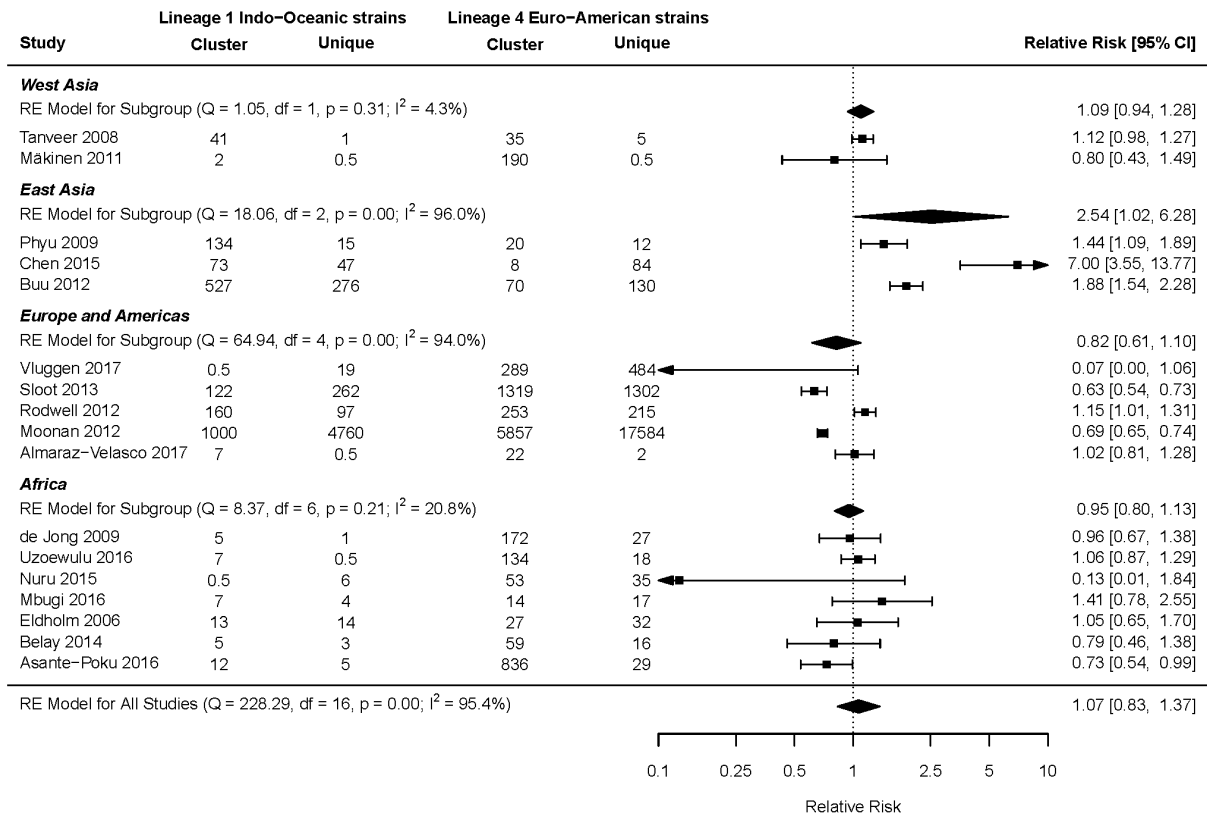

Figure S4B. RR of transmission chains for lineage 2 Beijing strains.

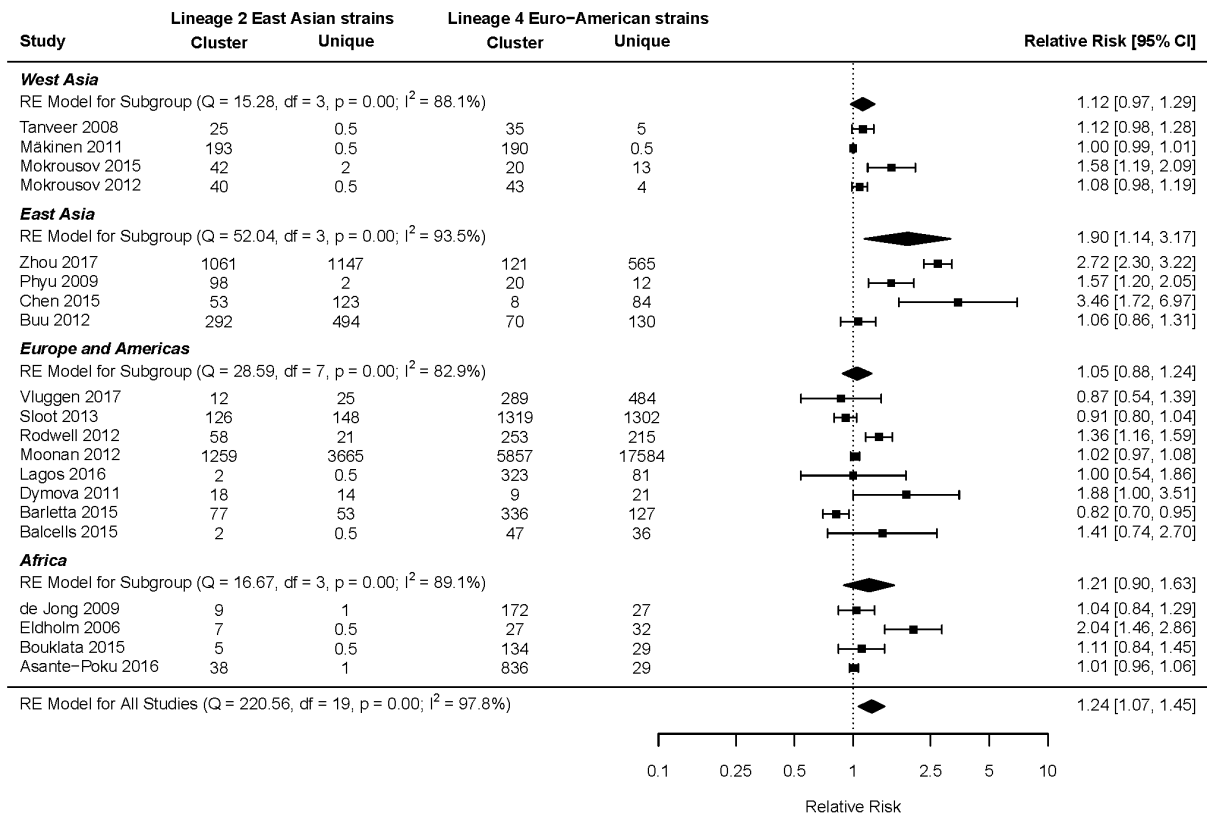

**Figure S4C. RR of transmission chains for lineage 3 strains.**

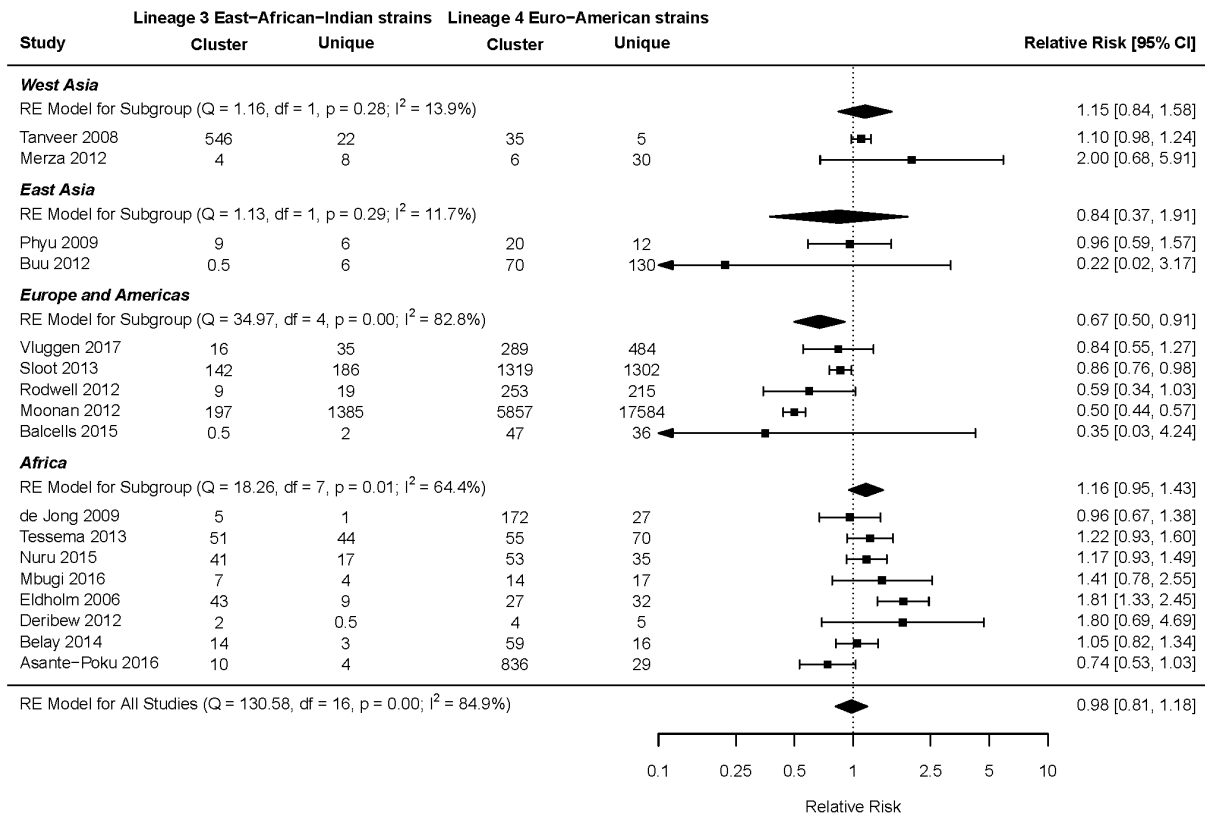

**Figure S4D. RR of transmission chains for lineage 5 and 6 strains.**

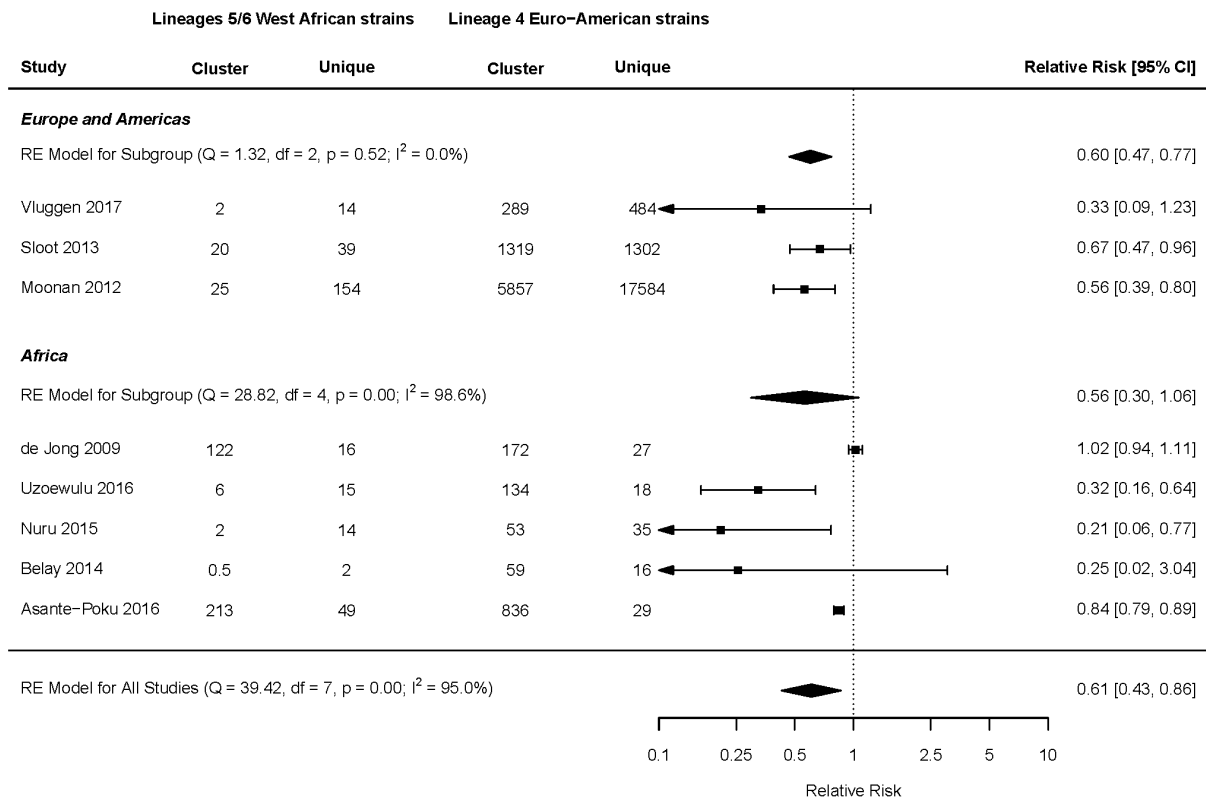

145 **Figure S4E. RR of transmission chains for animal strains.**

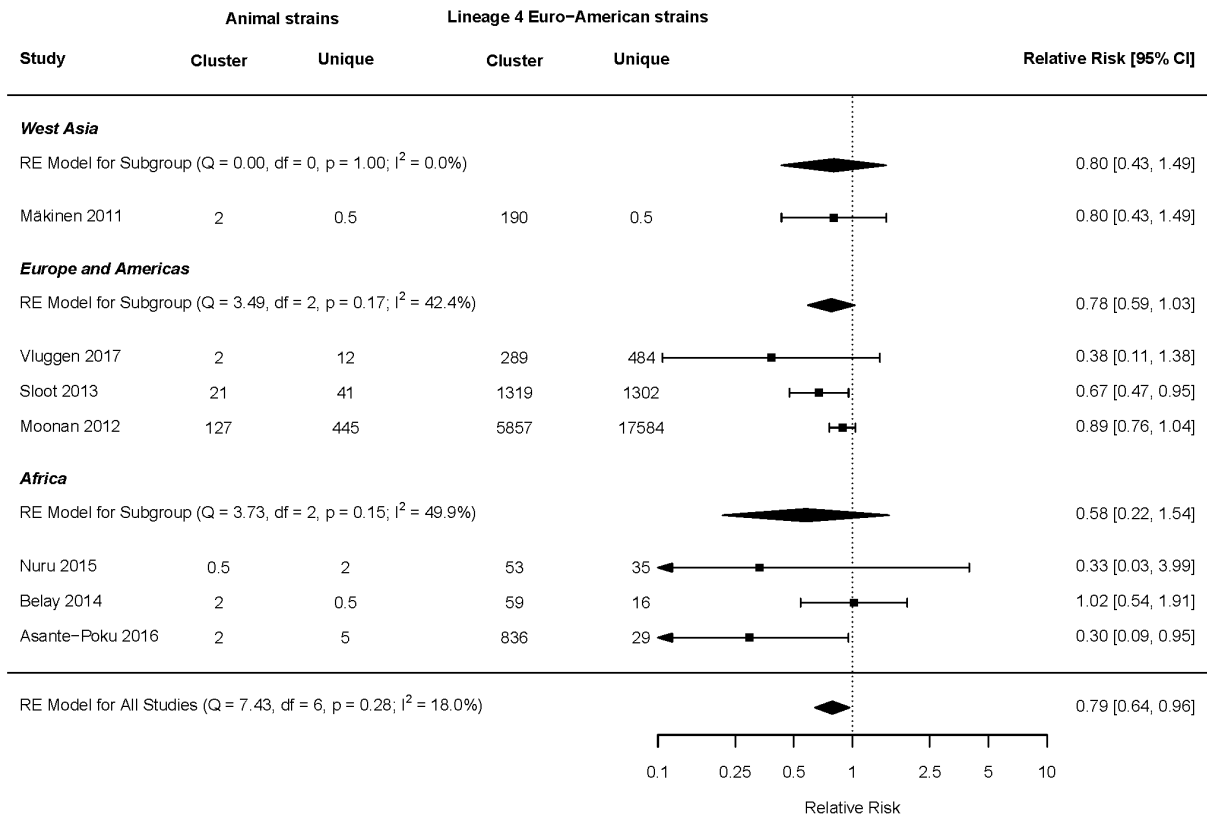

**Figure S4F. RR of transmission chains for unknown strains.**

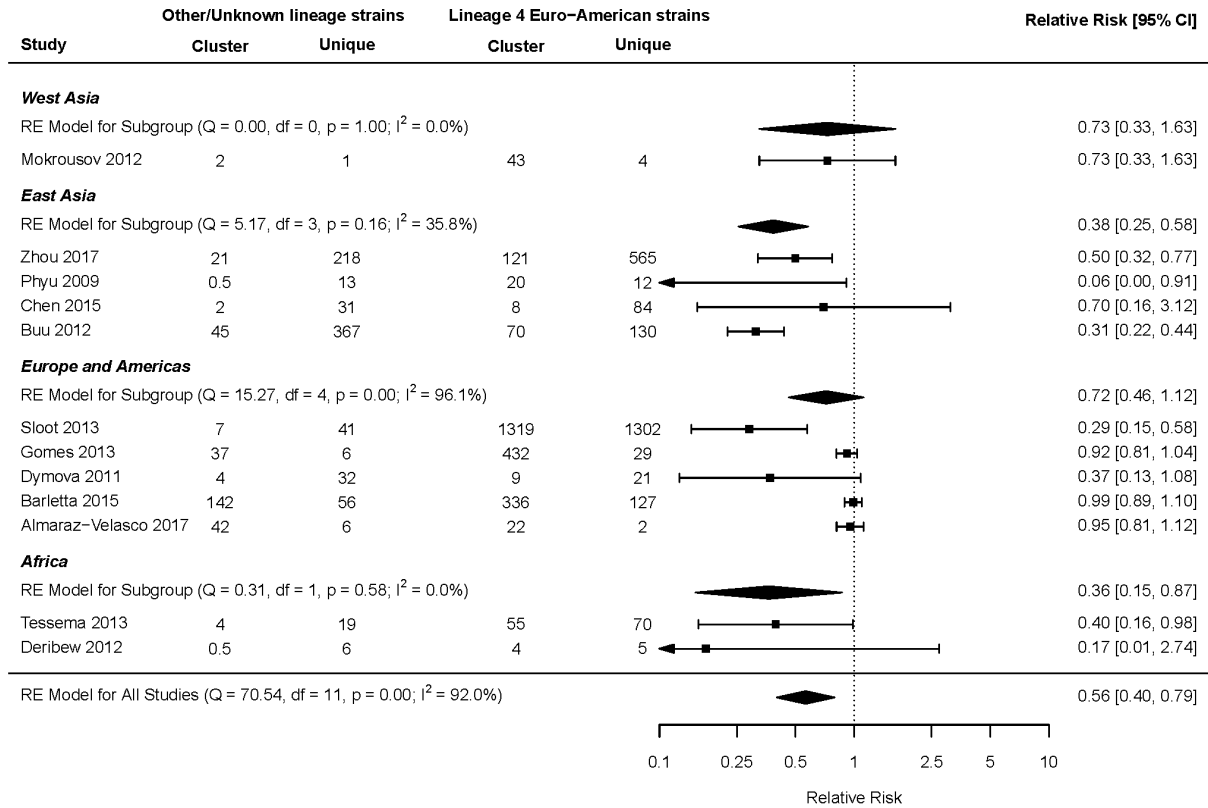

Supplement: MOESM1 [file 16238438]
